# Supplementary material for: Litsea glaucescens Kuth possesses bactericidal activity against Listeria monocytogenes
Source: PeerJ. 2023 Dec 1;11:e16522. doi: 10.7717/peerj.16522 (PMC10695109; doi:10.7717/peerj.16522)
Supplement: Supplemental Information 1 — All fractions obtained from chromatographic separations. Each data is the diameter (mm) obtained for each treatment. [file peerj-11-16522-s001.xlsx]

## Sheet: Table1
Extract	Concentration (mg/mL)	INHIBITION ZONE (mm)
		Exp1	Exp2	Exp3
LgHex	100	0	0	0
	50	0	0	0
	25	0	0	0
	12.5	0	0	0
LgCH2Cl2	100	0	0	0
	50	0	0	0
	25	0	0	0
	12.5	0	0	0
LgAcOEt	100	0	0	0
	50	0	0	0
	25	0	0	0
	12.5	0	0	0
LgMeOH	100	11.05	11.95	11.5
	50	0	0	0
	25	0	0	0
	12.5	0	0	0
Kanamicyn	0.032	24.5	24.55	24.45
Tetraciclyn	0.032	33.9	33.8	33.7

## Sheet: Table2
Fraction	Concentration (mg/mL)	Inhibition Zone (mm)			MIC (mg/mL)			MBC (mg/mL)
		Exp1	Exp2	Exp3	Exp1	Exp2	Exp3	Exp1	Exp2	Exp3
C1F1	10	0	0	0
C1F2	10	0	0	0
C1F3	10	0	0	0
C1F4	10	12.5	12.46	12.54	0.78	0.78	0.78	0.78	0.78	0.78
C1F5	10	0	0	0
C1F6	10	0	0	0
C1F7	10	0	0	0
C1F8	10	0	0	0
C1F9	10	0	0	0
C1F10	10	0	0	0
Kanamicyn	0.032	24.5	24.55	24.45	0.001	0.001	0.001	0.001	0.001	0.001
Tetraciclyn	0.032	33.9	33.8	33.7	0.004	0.004	0.004	0.004	0.004	0.004

## Sheet: Table3
Fraction	MIC (mg/mL)			MBC (mg/mL)
	exp1	exp2	exp3	exp1	exp2	exp3
C2F1	>6.14	>6.14	>6.14	>6.14	>6.14	>6.14
C2F2	>6.14	>6.14	>6.14	>6.14	>6.14	>6.14
C2F3	>6.14	>6.14	>6.14	>6.14	>6.14	>6.14
C2F4	0.68	0.68	0.68	0.68	0.68	0.68
C2F5	>6.14	>6.14	>6.14	>6.14	>6.14	>6.14
C2F6	>6.14	>6.14	>6.14	>6.14	>6.14	>6.14
Kanamicyn	0.001	0.001	0.001	0.001	0.001	0.001
Tetraciclyn	0.004	0.004	0.004	0.004	0.004	0.004
