# Supplementary material for: Litsea glaucescens Kuth possesses bactericidal activity against Listeria monocytogenes
Source: PeerJ. 2023 Dec 1;11:e16522. doi: 10.7717/peerj.16522 (PMC10695109; doi:10.7717/peerj.16522)
Supplement: Supplemental Information 3 [file peerj-11-16522-s003.xlsx]

## Sheet: Hoja1
	Chromatographic separation of methanolic extract of leaves of L. glaucenses (LgMeOH)									Chromatographic separation of LMC1R4.
	Elution system	Fractions	Coalescence	Code						Elution system	Fractions	Coalescences	Code
	Hexane: AcOEt									Hexane-Acetone
	Hexane (100%)	1-4	1-7	LMC1R1						80:20	1-5	1-6	LMC2R4-1
	90-10	5-24	8-12	LMC1R2						79:21	6-10	7-8	LMC2R4-2
	80-20	25-33	13-24	LMC1R3						78:22	11-15	9-10	LMC2R4-3
	70-30	34-50	25-53	LMC1R4						77:23	16-20	11-13	LMC2R4-4 (5,7-dihidroxy-flavanone)
	60-40	51-67	54-76	LMC1R5						76:24	21-25	14-31	LMC2R4-5
	50-50	68-75	77-103	LMC1R6						75:25	26-30	32-55	LMC2R4-6
	CH2Cl2 (100%)	76-81	104-114	LMC1R7						74:26	31-35
	90-10	82-87	115-136	LMC1R8						73:27	36-40
	80-20	88-104	137-138	LMC1R9						72:28	41-45
	70-30	105-112	139-142	LMC1R10						71:29	46-50
	60-40	113-124								70:30	51-55
	50-50	125-134
	Acetone	135-138
	MeOH	139-142
	AcOEt= ethyl acetate, CH2Cl2 = dichlorometane, MeOH= methanol
